# Supplementary material for: Protein analysis and gene expression indicate differential vulnerability of Iberian fish species under a climate change scenario
Source: PLOS journal article supplement (doi:10.1371/journal.pone.0181325), 2017-07-18

# Protein folding

Figure S1

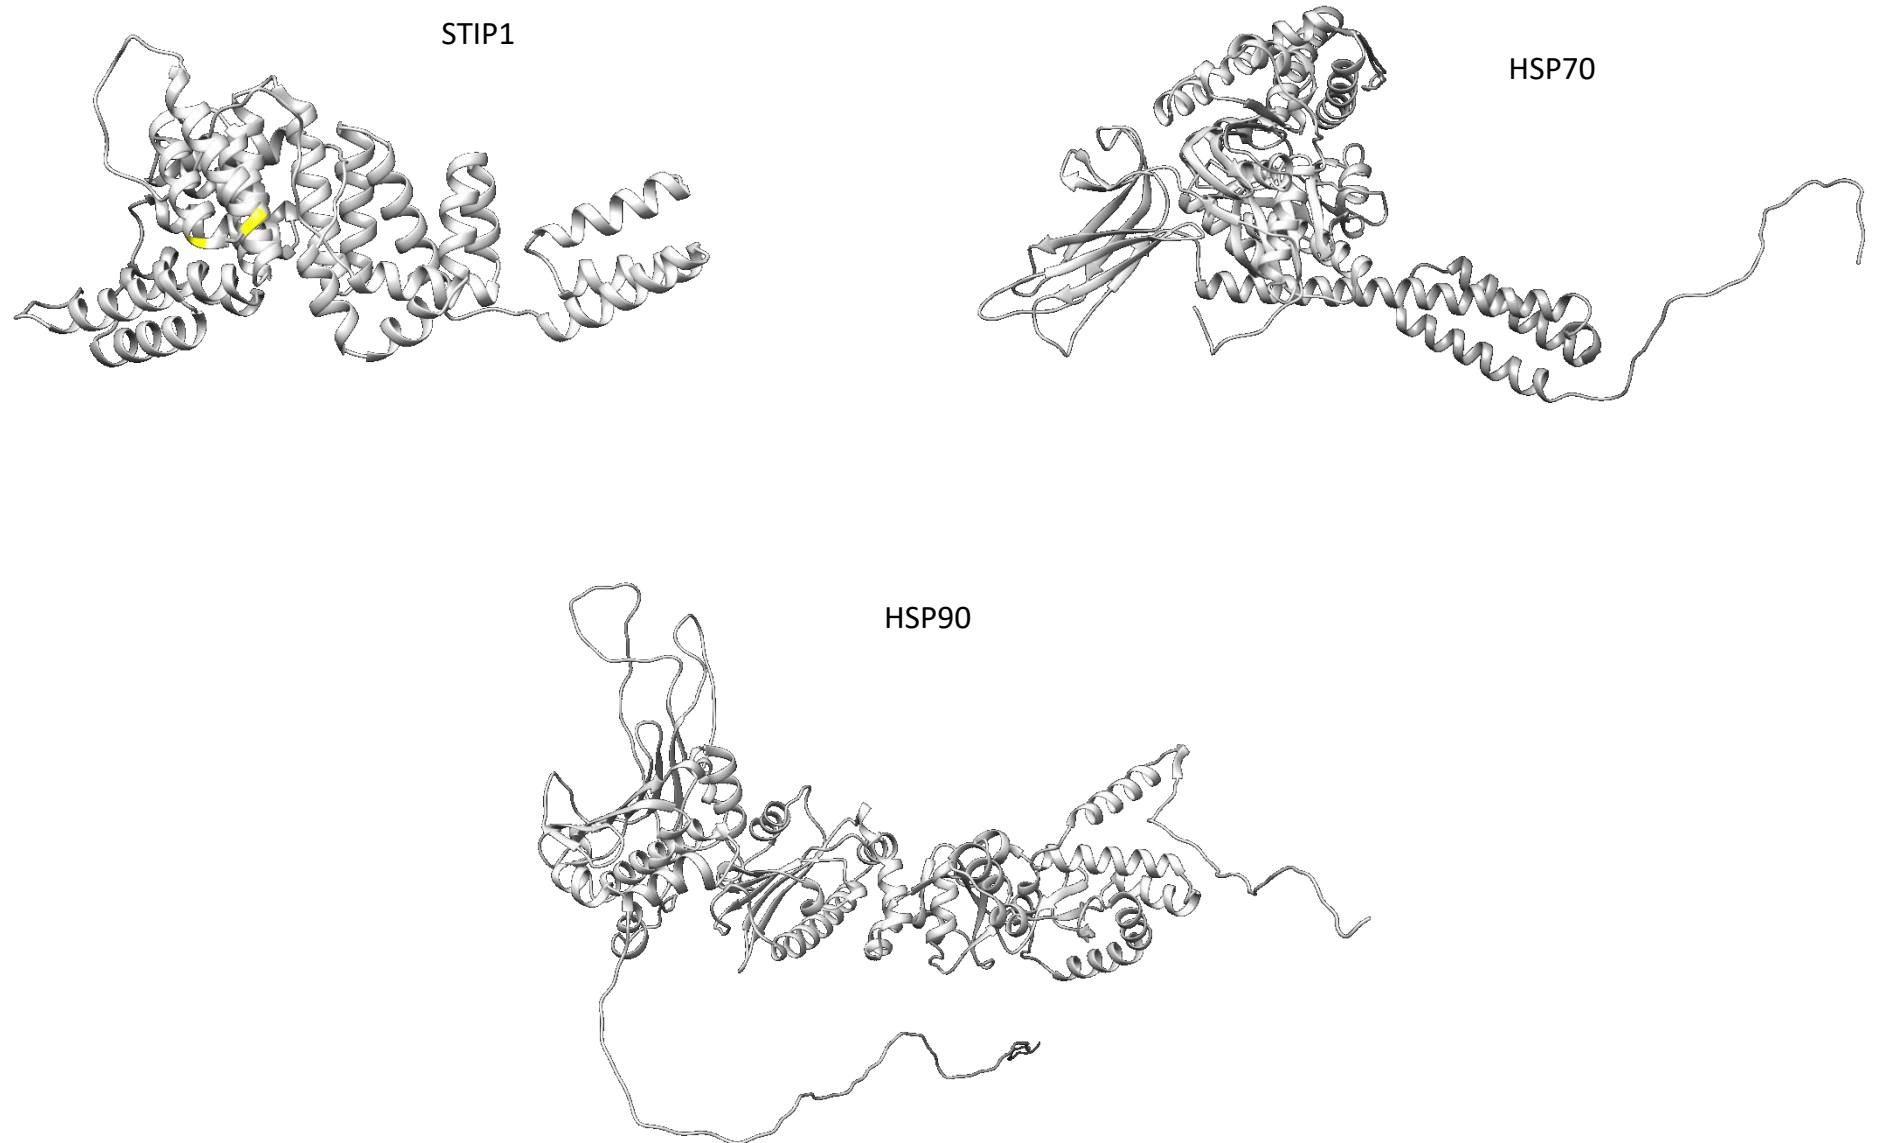

# Energy metabolism

Figure S1

CS

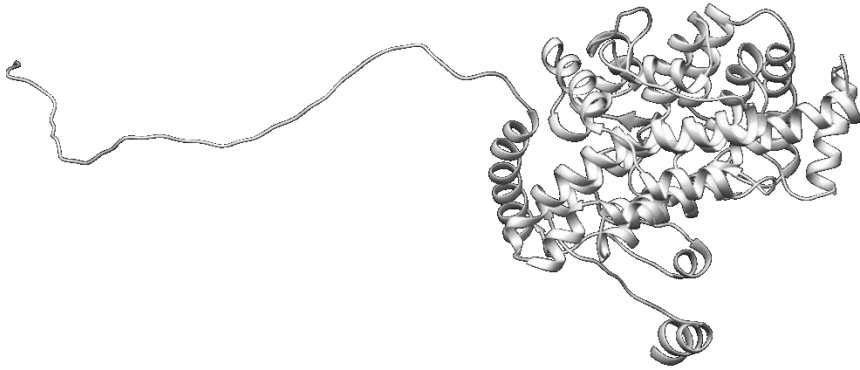

LDHA

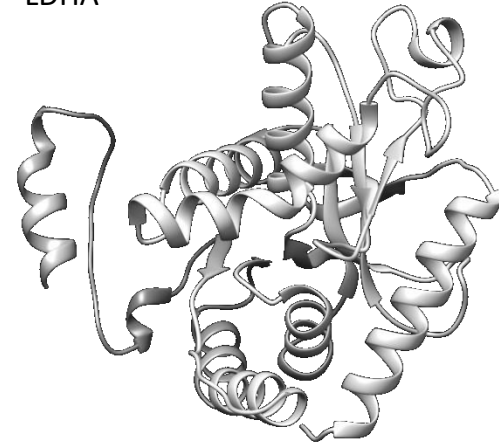

NDUFB8

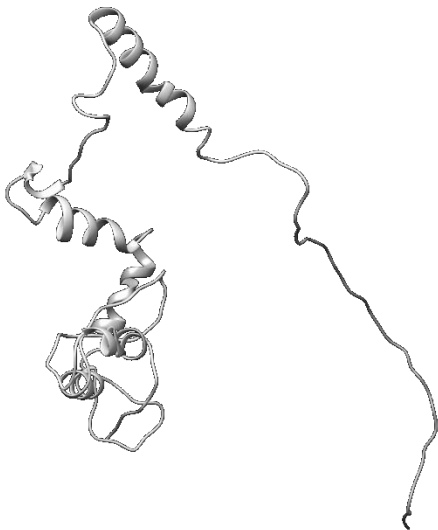

GLULA

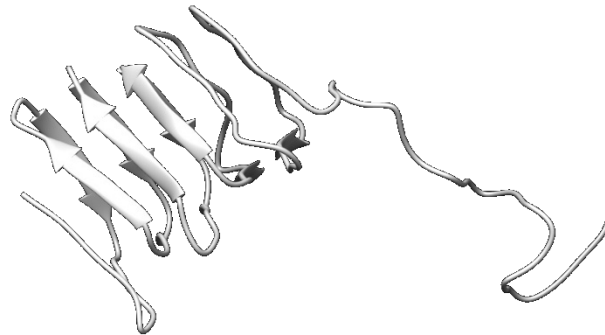

LOX

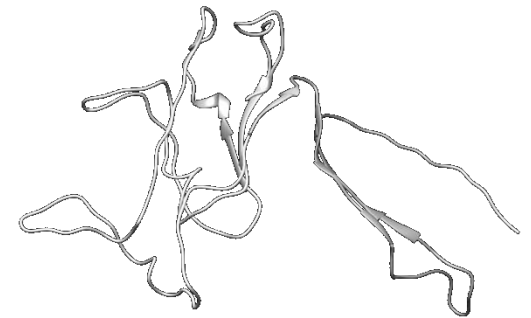

# Cyrcadian rhythm

PER1A

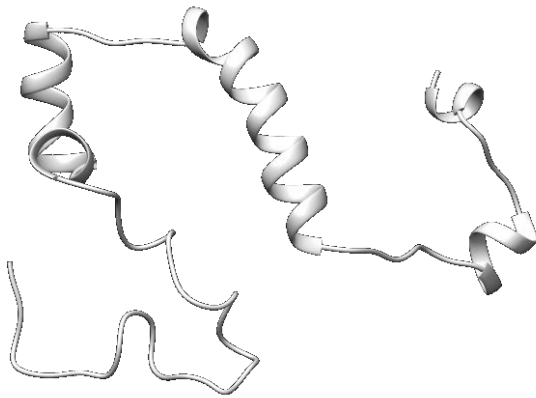

CRY1AA

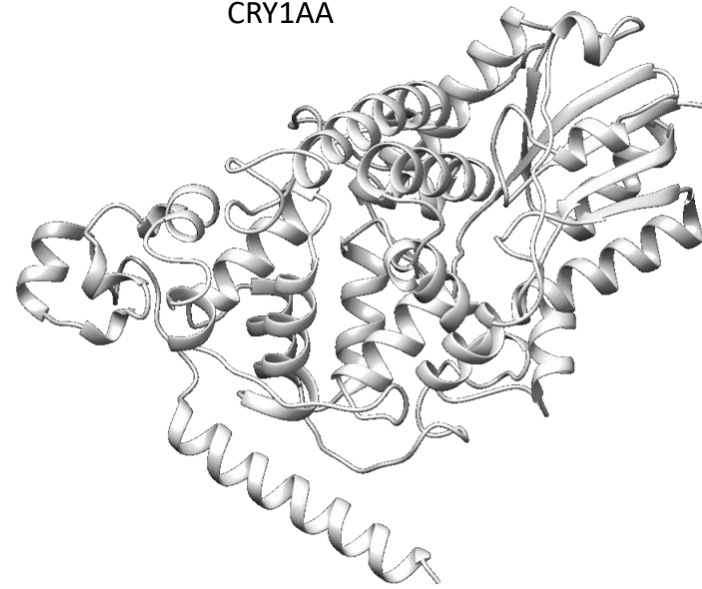

Supplement: S1 (10.1371/journal.pone.0181325.s001) [file journal.pone.0181325.s001]
